# Supplementary material for: Risk profile of low pathogenicity avian influenza virus infections in farms in southern Vietnam
Source: PubMed Central journal article supplement — J Vet Med Sci. 2022 May 13;84(6):860–8. doi: 10.1292/jvms.22-0011 (PMC9246698; doi:10.1292/jvms.22-0011), 2022-05-13
Supplement: jvms-84-860-s001.pdf [file jvms-84-860-s001.pdf]

**Supplementary Figure 1. Le *et al.***

**QUESTIONNAIRE FOR LPAI INVESTIGATION ON THE KNOWLEDGE, ATTITUDE,  
PRACTICES, AND IMPACT AT FARMS**

**I. INFORMATION TO READ TO RESPONDENT**

Good morning/afternoon/evening. I am ....., a veterinarian of.....

We are planning a study in August 2019 and September 2019 to identify potential risk factors of low pathogenicity avian influenza. The information will help finding appropriate control and prevention strategies for of low pathogenicity avian influenza in Vietnam.

Participation in this survey will take approximately 40 minutes. Your participation in this research is voluntary. There is a possibility that you may feel uncomfortable with the questions, but you may stop whenever you want or skip the question.

There are no risks for participating.

If at any time during the interview you are not clear about the question, be sure to ask me.

If you have any questions later, please contact

- Dr. Le Thanh Tung, Director of Vinh Long Sub-Department of Animal Health
- Dr. Le Trung Kien, Vietnam Department of Animal Health
- Or Dr. Chu Duc Huy, Vietnam Department of Animal Health

## II. QUESTIONNAIRE

|                       |                |
|-----------------------|----------------|
| Date of investigation | __ / __ / ____ |
| Name of investigator  |                |

### Address

|                        |  |
|------------------------|--|
| Province               |  |
| District               |  |
| Commune                |  |
| Model                  |  |
| Name of farmer         |  |
| Phone number of seller |  |
| Order collected sample |  |

X co-ordinate: .....

Y co-ordinate: .....

### A. GENERAL INFORMATION

1. How old are you?

Under 20

41-50

21-30

Over 50

31-40

2. What is your gender?

Male

Female

3. What is your highest education?

None

High school

Elementary

College

Middle school

Other .....



2. Have you ever heard about LPAI (low pathogenicity avian influenza)? (If no, skip Q3)
- Yes  no
3. What is the difference between HPAI and LPAI?
- Mortality  Clinical signs  Infectivity  Don't know
4. What is the causative agent of AI?
- Virus  Bacteria  Parasite  Don't know
5. Which animals can be infected with AI?
- Only chicken  Poultry  Mammals  Don't know
6. From where did you learn about AI?
- TV  Market manager  
 Radio  Animal health worker  
 Newspaper  Training course  
 Brochure  Other....
7. Do you think that AI can be prevented? (if the answer is Not sure/Don't know, skip Q6)
- Yes  Not sure  Don't know
8. In your opinion, Can you tell me something that you think you could do to prevent AI in your poultry when you introduce the new flocks or handling/slaughtering them?
- Vaccine  Wash hand with soap before and after taking care of poultry and other animal  
 Keep poultry in good condition (clean area)  Wear gloves  
 Separate species  Wear a mask  
 Keep separately all poultry from other poultry for at least 2 weeks  Other.....
9. In your opinion, how is AI spread among poultry?
- Contact with infected bird  Other....

- Contact with contaminated equipment
- Contact with virus brought by people, their clothing or footwear
- Don't know

10. In your opinion, how is AI spread in humans?

- Contact with infected or sick bird
- Contact with contaminated equipment
- Eat duck blood pudding
- Other....
- Don't know

11. Have you ever seen the infected poultry with AI showing clinical signs?

- Yes
- No
- Not sure

12. Which infected avian species will show the clinical signs?

- Chicken
- Duck
- Muscovy duck
- Not at all

13. Do you know the clinical signs of AI in poultry?

- Sleepiness
- Dark/red/blue comb and wattles
- Swollen and puffy looking eyes
- Sudden death in large number
- Ruffled feathers
- Diarrhea
- Other....
- Don't know

14. What do you do with your poultry that you suspect have AI?

- Keep them in a closed building/separate from other poultry and animal
- Sell them
- Slaughter for food
- Throw them away in river or pond
- Kill them and bury them
- Burn them
- Report to local authority
- Give antibiotics
- Do nothing
- Other.....

15. What will you do if there is an outbreak of AI in the area where you purchase your poultry?

- Sell off all your poultry  Do nothing
- Follow animal health authority instruction  Other.....

16. Have you ever attended, been trained or participated in an activity that educated about bird flu?

- Yes How many times?.....
- No When is the latest time?.....

17. Do you know about Decree number 119/2013/NĐ-CP dated 09-10-2013 of Prime minister on the regulations of administrative sanctions in the field of animal health, livestock, animal feeds, and Circular number 53/2013/TT-BNNPTNT dated 12-12-2013 of the Ministry of Agriculture and Rural Development for terrestrial animal diseases reporting regulations?

- Yes  Not sure
- No

18. Do you know the purpose of the surveillance?

- Yes  Not sure
- No

If your answer is yes, can you explain:

.....

.....

.....

**C. ATTITUDES**

1. If you thought, you had a bird flu case in your cage or near your shop (other owner) would you report it? (If the answer is No/Not sure, skip Q2)

- Yes  Not sure
- No

2. To whom would you be more likely to report suspected cases of bird flu in poultry?

- Market manager  Local authority
- Veterinarian

3. Do you think you will be safe from bird flu without using PPE in handling the poultry?

- Yes  Not sure
- No

4. Bird flu issues are important for your business?
- Yes  Not sure
- No
5. How serious a problem do you think bird flu is in Vietnam or your region?
- Very  Not very
- Somewhat
6. Do you feel well informed about bird flu?
- Yes
- No
7. Do you agree with the current solutions of local authority for the control of AI?
- Yes  Not sure
- No
8. Do you think the programs of AI control will give you more benefits?
- Very  Not sure
- Somewhat
9. Do you think that for the control of AI is a part of your responsibility?
- Yes  Not sure
- No
10. Do you wish you could get more information about bird flu?
- Yes
- No
11. What are the sources of information you think can get effectively on bird flu?
- TV  Market manager
- Radio  Animal health workers
- Poster, brochures  Family, friends, neighbors and colleagues

Newspapers

Other.....

12. Do you willing to participate in an AI surveillance?

Yes

No

#### D. PRACTICES

1. Do you use the personal protective equipment (e.g. mask, gloves) when handling or slaughtering live birds? (should be checked directly by interviewer)

Yes

No

❖ If the answer is **Yes**: How often do you use?

Every time

Sometime

❖ If the answer is **No**: Why did not you use?

Cost money

I don't believe it help to protect from AI

It is not convenience

2. Do you use the personal protective equipment (e.g. mask, gloves) when contacting with sick or dead birds?

Every time

Never

Sometime

3. Do you use soap or disinfectant to clean your hands and equipment after finishing your work?

Yes

No

❖ If the answer is **Yes**: How often do you use?

Every time

Sometime



❖ If the answer is **No**: Why did not you use?

- Cost money  I don't believe it help to protect from AI  
 It is not convenience

4. Do you spray disinfectant on your vehicles before and after you use for transport poultry?

- Every time  Never  
 Sometime

5. Do you use the same vehicle to carry other products or humans (your family)?

- Every time  Never  
 Sometime

6. What will you do when you find the dead birds during your transportation? (select more than 1)

- Keep them in sealed plastic bags  Burn them  
 Sell them  Report to animal health workers  
 Slaughter for food  Other.....  
 Throw them away on the road

7. Do you sanitize the lairage?

- Yes  
 No

❖ If the answer is **Yes**: How often do you sanitize the lairage?

- Every day  After selling batch  
 Every week  Never  
 Every month

❖ If the answer is **Yes**: How do you sanitize lairage area?

- Cleaning by normal water  By disinfection materials  
 Cleaning by brush

❖ If the answer is **No**: Why did not you clean up?

- |                                                                                |                                                                     |
|--------------------------------------------------------------------------------|---------------------------------------------------------------------|
| <input type="checkbox"/> Cost money and waste time                             | <input type="checkbox"/> I don't believe it help to protect from AI |
| <input type="checkbox"/> It not my responsibility, it belong to market manager | <input type="checkbox"/> Not required                               |

8. What will you do when you find the **sick birds** in your business area? (select more than 1 answer)

- |                                                                   |                                                          |
|-------------------------------------------------------------------|----------------------------------------------------------|
| <input type="checkbox"/> Keep them in separate from other poultry | <input type="checkbox"/> Slaughter for food              |
| <input type="checkbox"/> Sell them as soon as possible            | <input type="checkbox"/> Report to animal health workers |
| <input type="checkbox"/> Give them antibiotics                    | <input type="checkbox"/> Do nothing                      |

9. What will you do when you find the **dead birds** in your business area? (select more than 1 answer)

- |                                                                   |                                                          |
|-------------------------------------------------------------------|----------------------------------------------------------|
| <input type="checkbox"/> Keep them in separate from other poultry | <input type="checkbox"/> Bury or burn them               |
| <input type="checkbox"/> Sell them                                | <input type="checkbox"/> Report to animal health workers |
| <input type="checkbox"/> Slaughter for food                       | <input type="checkbox"/> Other.....                      |
| <input type="checkbox"/> Throw them away                          |                                                          |

10. Do you separate the new imported birds?

- Yes  
 No

11. Do you keep chickens separate with ducks or Muscovy duck? (interviewer should observe the real situation)

- Yes  
 No

12. How do you usually sell your poultry products?

- Sell directly in the market ; Name of market:.....
- Sell to the trader
- Seft-consumption

## E. IMPACT

1. Contribution of poultry to your total income:

- Under 10%
- 10 – 30%
- 31% - 50%
- Over 50%
- Not related to income

2. How your income from poultry changed within the last six months?

- Increase
- Decrease
- No change

3. How does the requirement of the trader to the quality of poultry change??

- Increase
- Decrease
- No change

4. Do you want to invest more in your poultry business?

- Yes
- No

5. How much did you pay for the treatment of your poultry last year?

.....  
.....

How did the treatment cost change compare to the previous year?

- Increase
- Decrease
- No change

**Thank you very much for participating in our survey.**

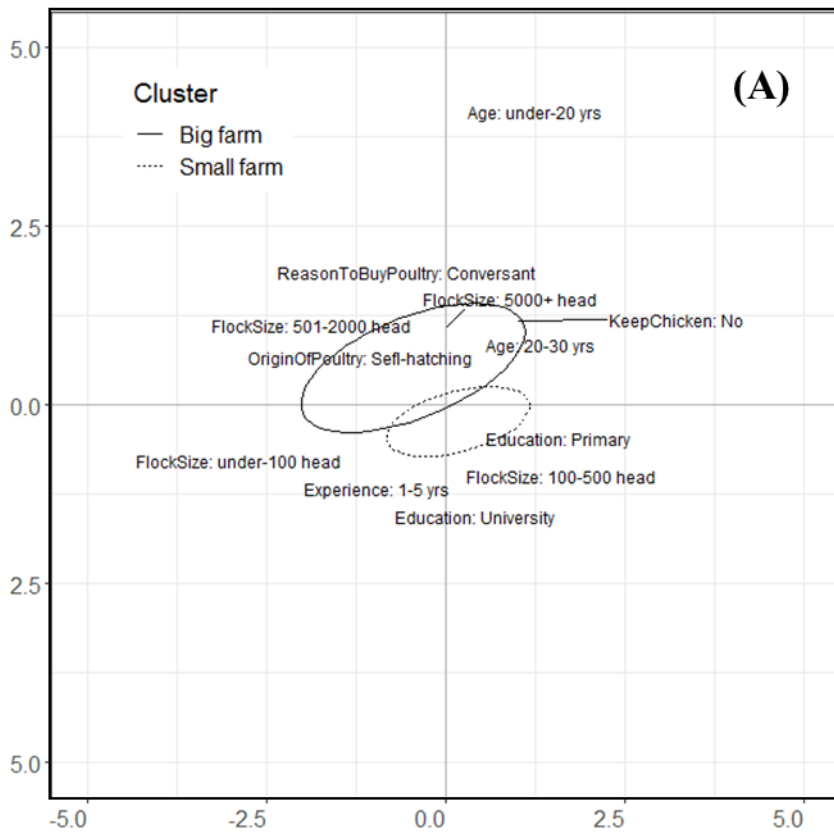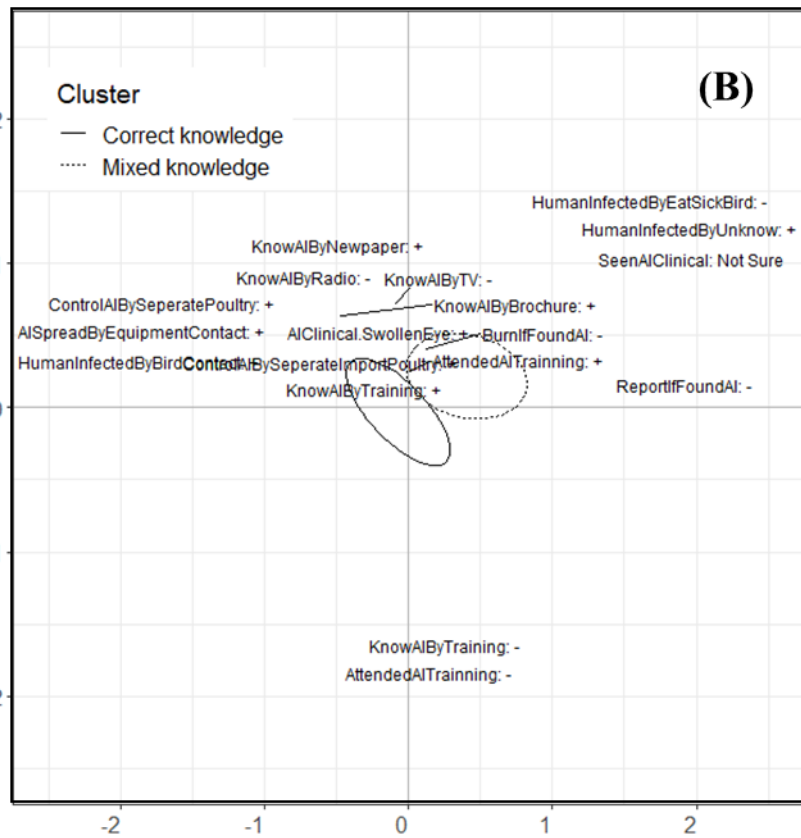

**Supplementary Figure 2. MCA biplot in each of four sections.** MCA scatterplot shows questionnaire responses related to respondent demographics (A), knowledge (B), attitude (C), and practice (D). The clusters identified by the hierarchical clustering on principal components method were indicated by ellipses superimposed on each MCA scatterplot.

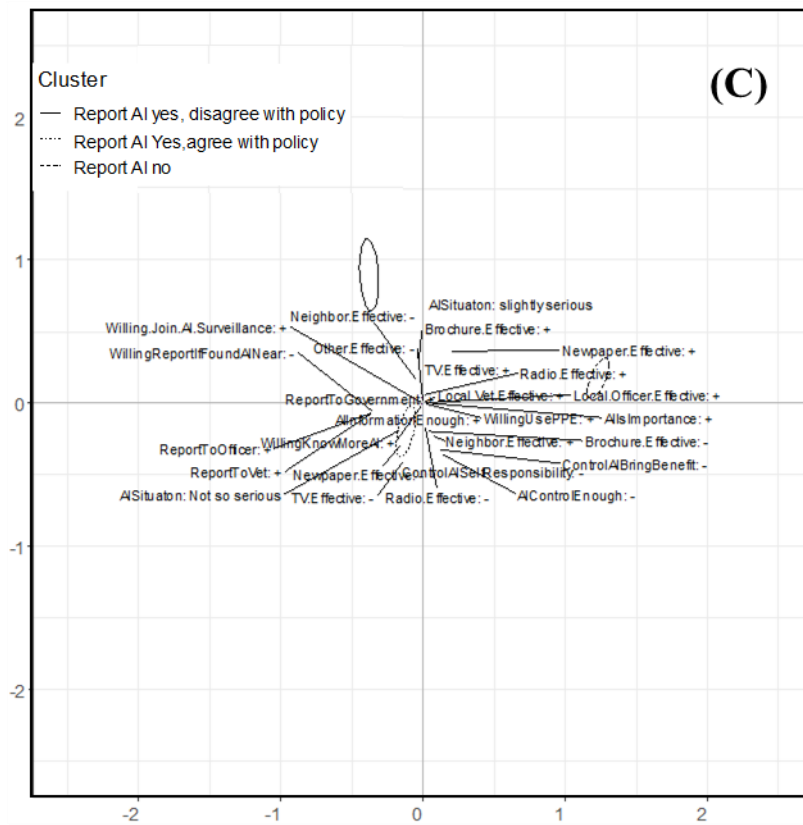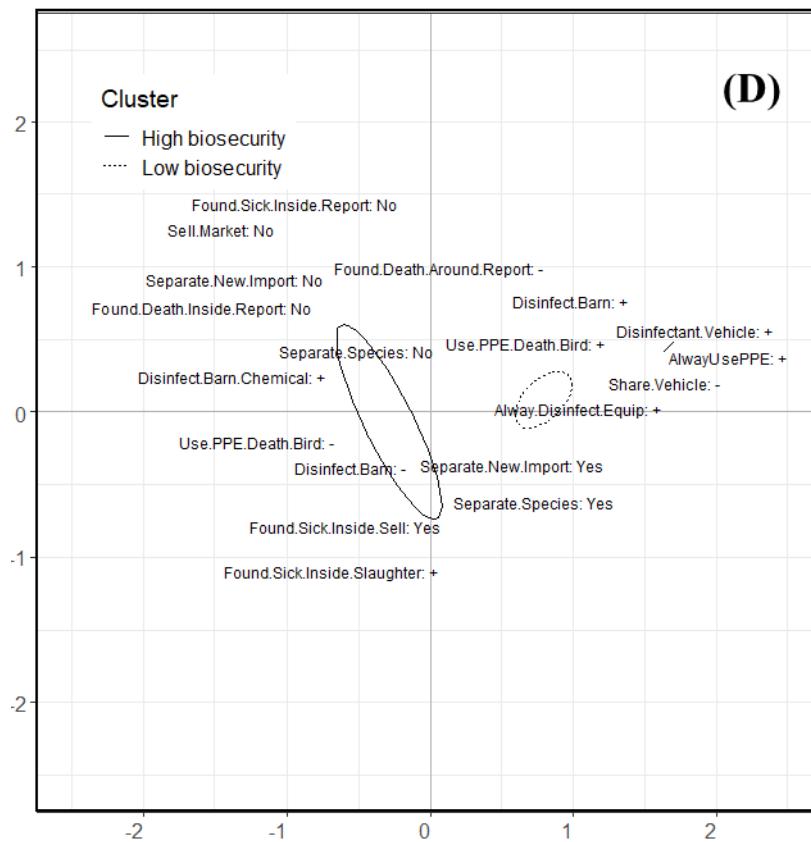

**Supplementary Figure 2 (cont). MCA biplot in each of four sections.** MCA scatterplot shows questionnaire responses related to respondent demographics (A), knowledge (B), attitude (C), and practice (D). The clusters identified by the hierarchical clustering on principal components method were indicated by ellipses superimposed on each MCA scatterplot.

**Supplementary Table 1.** Summary of avian influenza virus surveillance in Vietnam from 2009 to 2019

| Year         | Region  | Province  | No. of samples | AIV positive | Prevalence (95% CI) | Subtype (no. of isolates)                                                                                                           | Reference |
|--------------|---------|-----------|----------------|--------------|---------------------|-------------------------------------------------------------------------------------------------------------------------------------|-----------|
| 2009         | North   | Nam Dinh  | 700            | -            | 0.0                 |                                                                                                                                     |           |
|              | South   | Bac Lieu  | 758            | 39           | 5.1 (3.7–7.0)       | H3N2 (1), H3N8 (1), H4N6 (7), H9N2 (26), H11N3 (3), (H11N9 (1)                                                                      | [22]      |
| 2010         | North   | Nam Dinh  | 761            | -            | 0.0                 |                                                                                                                                     |           |
|              | South   | Bac Lieu  | 1,327          | 26           | 2.0 (1.3–2.9)       | H6N2 (24), H6N6 (1), H9N6 (1)                                                                                                       | [22]      |
| 2011         | North   | Nam Dinh  | 600            | 6            | 1.0 (0.4–2.2)       | H3N8 (1), H4N2 (1), <b>H5N1 (1)</b> , H6N6 (3)                                                                                      | [23]      |
|              | South   | Ca Mau    | 1,511          | 81           | 5.4 (4.3–6.6)       | H3N6 (1), H3N8 (7), H4N6 (4), <b>H5N1 (16)</b> , H6N2 (46), H6N9 (2), H11N5 (3), H11N9 (2)                                          | [23]      |
| 2012         | North   | Nam Dinh  | 1,201          | 74           | 6.2 (4.9–7.7)       | H3N2 (11), H3N6 (9), H3N8 (10), H4N6 (6), <b>H5N1 (26)</b> , H5N2 (1), H6N2 (4), H6N6 (6), H9N2 (10), H9N8 (1), H11N9 (4)           | [23]      |
|              | South   | Dong Thap | 1,224          | 40           | 3.3 (2.3–4.4)       | H4N6 (1), <b>H5N1 (4)</b> , H6N2 (1), H7N1 (2), H9N2 (13), H10N7 (3), H11N3 (2)                                                     | [23]      |
| 2014         | Central | Hue       | 3,045          | 178          | 5.8 (5.0–6.7)       | H3N2 (18), H3N6 (1), H4N6 (2), <b>H5N6 (8)</b> , H6N2 (14), H6N6 (16), H9N2 (109), H9N6 (5), H11N6 (1), H11N7 (4)                   | [4, 5]    |
| 2015         | Central | Hue       | 2,040          | 49           | 2.4 (1.8–3.2)       | H3N1 (1), H3N8 (3), H4N2 (3), <b>H5N1 (4)</b> , <b>H5N6 (9)</b> , H6N1 (14), H9N2 (15)                                              | [21]      |
|              | South   | Vinh Long | 1,400          | 243          | 17.4 (15.4–19.4)    | H3N2 (1), H4N6 (1), <b>H5N1 (130)</b> , H6N6 (24), H9N2 (86), H11N9 (1)                                                             | [21]      |
| 2016         | South   | Vinh Long | 3,300          | 131          | 4.0 (3.3–4.7)       | H3N2 (11), H3N8 (2), <b>H5N1 (5)</b> , H6N6 (69), H9N2 (31), H10N6 (7), H11N9 (5), H12N5 (1)                                        | [18]      |
| 2017         | North   | Lang Son  | 1,000          | 148          | 14.8 (12.7–17.2)    | <b>H5N6 (6)</b> , H6N6 (3), H9N2 (139)                                                                                              |           |
|              | South   | Vinh Long | 1,800          | 167          | 9.3 (8.0–10.7)      | H3N2 (2), <b>H5N1 (21)</b> , H6N6 (63), H9N2 (79), H10N3 (2)                                                                        | [18]      |
| 2018         | North   | Lang Son  | 1,000          | 306          | 30.6 (27.8–33.6)    | H3N2 (29), <b>H5N6 (2)</b> , H6N6 (89), H9N2 (186)                                                                                  |           |
|              | South   | Vinh Long | 1,846          | 139          | 7.5 (6.4–8.8)       | H3N2 (1), H4N6 (2), <b>H5N1 (17)</b> , <b>H5N6 (11)</b> , H6N6 (52), H7N7 (3), H9N2 (47), H9N6 (1), H11N1 (1), H11N9 (3), H13N9 (1) | [17]      |
| 2019         | North   | Lang Son  | 1,000          | 206          | 20.6 (18.1–23.2)    | <b>H5N6 (2)</b> , H6N6 (25), H9N2 (179)                                                                                             |           |
|              | South   | Vinh Long | 1,634          | 109          | 6.7 (5.5–8.0)       | <b>H5N1 (12)</b> , <b>H5N6 (22)</b> , H6N6 (31), H9N2 (42), H10N3 (2)                                                               |           |
|              | South   | An Giang  | 200            | 77           | 38.5 (31.7–45.6)    | H3N2 (3), <b>H5N6 (9)</b> , H6N6 (14), H9N2 (51)                                                                                    |           |
| <b>Total</b> |         |           | 26,347         | 2,019        | 7.7 (7.3–7.9)       |                                                                                                                                     |           |

AIV: avian influenza virus, CI: confidence interval.

High pathogenicity avian influenza viruses are highlighted in bold.

**Supplementary Table 2.** Unconditional associations between the outcome variable (virus isolation positive) and the 21 explanatory variables.

| <b>Variable</b>                                                 | <b>VI positive</b> | <b>Birds</b> | <b>OR (95%CI)</b>   | <b>P-value</b> |
|-----------------------------------------------------------------|--------------------|--------------|---------------------|----------------|
| <b>Sampling species</b>                                         |                    |              |                     |                |
| Chicken                                                         | 10                 | 520          | 1.00                | Reference      |
| Duck                                                            | 1                  | 328          | 0.16 (0.01–0.83)    | 0.08           |
| Muscovy duck                                                    | 0                  | 80           | NA                  | 0.99           |
| <b>Age</b>                                                      |                    |              |                     |                |
| Under 20 year-old                                               | 1                  | 59           | 1.00                | Reference      |
| 20 - 30 year-old                                                | 10                 | 280          | 2.11 (0.39–39.04)   | 0.481          |
| 31 - 40 year-old                                                | 0                  | 280          | NA                  | 0.99           |
| 41 - 50 year-old                                                | 0                  | 279          | NA                  | 0.99           |
| Upper 50 year-old                                               | 0                  | 30           | NA                  | 1.00           |
| <b>Gender</b>                                                   |                    |              |                     |                |
| Female                                                          | 10                 | 220          | 1.00                | Reference      |
| Male                                                            | 1                  | 708          | 0.03 (0.00–0.16)    | <0.01          |
| <b>Education</b>                                                |                    |              |                     |                |
| Primary                                                         | 2                  | 318          | 1.00                | Reference      |
| High school                                                     | 9                  | 410          | 3.49 (0.75–16.27)   | 0.99           |
| College                                                         | 0                  | 60           | NA                  | 1.00           |
| University                                                      | 0                  | 10           | NA                  | 1.00           |
| No                                                              | 0                  | 130          | NA                  | 0.99           |
| <b>Experience</b>                                               |                    |              |                     |                |
| Under 1 year                                                    | 1                  | 49           | 1.00                | Reference      |
| 1 - 5 years                                                     | 9                  | 431          | 1.02 (0.19–19.07)   | 0.98           |
| 6 - 10 years                                                    | 1                  | 288          | 0.17 (0.01–4.35)    | 0.21           |
| More 10 year                                                    | 0                  | 160          | NA                  | 0.99           |
| <b>Keep duck</b>                                                |                    |              |                     |                |
| No                                                              | 10                 | 550          | 1.00                | Reference      |
| Yes                                                             | 1                  | 378          | 0.15 (0.01–0.76)    | 0.07           |
| <b>Keep Muscovy duck</b>                                        |                    |              |                     |                |
| No                                                              | 2                  | 757          | 1.00                | Reference      |
| Yes                                                             | 9                  | 171          | 19.92 (5.08–131.44) | <0.01          |
| <b>Buy the hatchlings from the same commune</b>                 |                    |              |                     |                |
| No                                                              | 9                  | 411          | 1.00                | Reference      |
| Yes                                                             | 2                  | 517          | 0.18 (0.03–0.69)    | 0.03           |
| <b>Reason to buy the hatchlings</b>                             |                    |              |                     |                |
| Cheap                                                           | 10                 | 289          | 1.00                | Reference      |
| Convenience                                                     | 1                  | 339          | 0.09 (0.00–0.45)    | 0.02           |
| Conversant                                                      | 0                  | 300          | NA                  | 0.99           |
| <b>AI can spread by contact with the contaminated equipment</b> |                    |              |                     |                |
| No                                                              | 10                 | 639          | 1.00                | Reference      |
| Yes                                                             | 1                  | 289          | 0.22 (0.01–1.16)    | 0.15           |
| <b>AI clinical sign can be observe in duck</b>                  |                    |              |                     |                |
| No                                                              | 10                 | 520          | 1.00                | Reference      |
| Yes                                                             | 1                  | 408          | 0.13 (0.01–0.67)    | 0.05           |

OR: odds ratio, CI: confidence interval, AI: avian influenza.

**Supplementary Table 2 (cont).** Unconditional associations between the outcome variable (virus isolation positive) and the 21 explanatory variables

| <b>Variable</b>                                                         | <b>VI positive</b> | <b>Birds</b> | <b>OR (95%CI)</b>   | <b>P-value</b> |
|-------------------------------------------------------------------------|--------------------|--------------|---------------------|----------------|
| <b>Willing to report if recognize an AI event around</b>                |                    |              |                     |                |
| Yes                                                                     | 3                  | 846          | 1.00                | Reference      |
| Not sure                                                                | 8                  | 82           | 27.51 (7.79–127.45) | <0.01          |
| <b>Report AI event to the local officer</b>                             |                    |              |                     |                |
| No                                                                      | 8                  | 82           | 1.00                | Reference      |
| Yes                                                                     | 3                  | 846          | 0.04 (0.01–0.13)    | <0.01          |
| <b>Report AI event to the local vet</b>                                 |                    |              |                     |                |
| No                                                                      | 8                  | 82           | 1.00                | Reference      |
| Yes                                                                     | 3                  | 846          | 0.04 (0.01–0.13)    | <0.01          |
| <b>Report AI event to the local government</b>                          |                    |              |                     |                |
| No                                                                      | 8                  | 82           | 1.00                | Reference      |
| Yes                                                                     | 3                  | 846          | 0.04 (0.01–0.13)    | <0.01          |
| <b>Do you think AI situation in your area become more severe?</b>       |                    |              |                     |                |
| No                                                                      | 10                 | 169          | 1.00                | Reference      |
| Yes                                                                     | 1                  | 759          | 44.91 (8.52–827.04) | <0.01          |
| <b>Brochure is an effective way to collect the AI information</b>       |                    |              |                     |                |
| No                                                                      | 10                 | 570          | 1.00                | Reference      |
| Yes                                                                     | 1                  | 358          | 0.16 (0.01–0.84)    | 0.08           |
| <b>Newspaper is an effective way to collect the AI information</b>      |                    |              |                     |                |
| No                                                                      | 10                 | 599          | 1.00                | Reference      |
| Yes                                                                     | 1                  | 329          | 0.18 (0.01–0.96)    | 0.11           |
| <b>Share vehicle</b>                                                    |                    |              |                     |                |
| Always                                                                  | 9                  | 131          | 1.00                | Reference      |
| Some time                                                               | 2                  | 297          | 0.10 (0.01–0.39)    | <0.01          |
| Never                                                                   | 0                  | 500          | NA                  | 0.99           |
| <b>Report the dead bird to the local authority if found it around</b>   |                    |              |                     |                |
| No                                                                      | 8                  | 82           | 1.00                | Reference      |
| Yes                                                                     | 3                  | 846          | 0.04 (0.01–0.13)    | <0.01          |
| <b>Report the sick bird to the local authority if found inside farm</b> |                    |              |                     |                |
| No                                                                      | 9                  | 41           | 1.00                | Reference      |
| Yes                                                                     | 2                  | 887          | 0.01 (0.00–0.04)    | <0.01          |



**Supplementary Table 3.** Numbers of respondents in each identified of the two respondent demographic cluster groups (n=61) and percentages of responses for each question type

| Variable                                             | Big farm<br>(n=17) | Small farm<br>(n=44) |
|------------------------------------------------------|--------------------|----------------------|
| <b>Age</b>                                           |                    |                      |
| Under 20 year-old                                    | 11.8               | 2.3                  |
| 20 - 30 year-old                                     | 29.4               | 31.8                 |
| 31 - 40 year-old                                     | 23.5               | 36.4                 |
| 41 - 50 year-old                                     | 29.4               | 29.5                 |
| Upper 50 year-old                                    | 5.9                | 0.0                  |
| <b>Gender</b>                                        |                    |                      |
| Female                                               | 11.8               | 38.6                 |
| Male                                                 | 88.2               | 61.4                 |
| <b>Education</b>                                     |                    |                      |
| No                                                   | 11.8               | 15.9                 |
| Primary                                              | 29.4               | 34.1                 |
| High school                                          | 58.8               | 34.1                 |
| College                                              | 0.0                | 13.6                 |
| University                                           | 0.0                | 2.3                  |
| <b>Experience</b>                                    |                    |                      |
| Under 1 year                                         | 0.0                | 11.4                 |
| 1 - 5 years                                          | 58.8               | 34.1                 |
| 6 - 10 years                                         | 23.5               | 34.1                 |
| More 10 years                                        | 17.6               | 20.5                 |
| <b>Keep chicken</b>                                  |                    |                      |
| No                                                   | 29.4               | 13.6                 |
| Yes                                                  | 70.6               | 86.4                 |
| <b>Keep duck</b>                                     |                    |                      |
| No                                                   | 64.7               | 52.3                 |
| Yes                                                  | 35.3               | 47.7                 |
| <b>Keep Muscovy duck</b>                             |                    |                      |
| No                                                   | 82.4               | 79.5                 |
| Yes                                                  | 17.6               | 20.5                 |
| <b>Flock size</b>                                    |                    |                      |
| Under 100 heads                                      | 0.0                | 15.9                 |
| 100 - 500 heads                                      | 5.9                | 79.5                 |
| 501 - 2000 heads                                     | 47.1               | 2.3                  |
| 2001 - 5000 heads                                    | 47.1               | 0.0                  |
| More than 5000 heads                                 | 0.0                | 2.3                  |
| <b>The most time to sell poultry</b>                 |                    |                      |
| Jan - Mar                                            | 100.0              | 100.0                |
| <b>Buy the hatchlings from the same commune</b>      |                    |                      |
| No                                                   | 58.8               | 27.3                 |
| Yes                                                  | 41.2               | 72.7                 |
| <b>Buy the hatchlings from the different commune</b> |                    |                      |
| No                                                   | 41.2               | 72.7                 |
| Yes                                                  | 58.8               | 27.3                 |

**Supplementary Table 3** (*cont*). Numbers of respondents in each identified of the two respondent demographic cluster groups (n=61) and percentages of responses for each question type

| <b>Variable</b>                     | <b>Big farm<br/>(n=17)</b> | <b>Small farm<br/>(n=44)</b> |
|-------------------------------------|----------------------------|------------------------------|
| <b>The origin of the hatchlings</b> |                            |                              |
| Self-hatching                       | 0.0                        | 27.3                         |
| Hatchery                            | 82.4                       | 15.9                         |
| Trader                              | 17.6                       | 56.8                         |
| <b>Reason to buy the hatchlings</b> |                            |                              |
| Cheap                               | 5.9                        | 61.4                         |
| Convenience                         | 35.3                       | 38.6                         |
| Conversant                          | 58.8                       | 0.0                          |

**Supplementary Table 4.** Numbers of respondents in each identified of the two respondent knowledge cluster groups (n=61) and percentages of responses for each question type

| Variable                                                           | Correct knowledge<br>(n=51) | Mixed knowledge<br>(n=10) |
|--------------------------------------------------------------------|-----------------------------|---------------------------|
| <b>Know AI</b>                                                     |                             |                           |
| Yes                                                                | 100.0                       | 100.0                     |
| <b>Know LPAI</b>                                                   |                             |                           |
| No                                                                 | 84.3                        | 100.0                     |
| Yes                                                                | 15.7                        | 0.0                       |
| <b>Know the different between HPAI and LPAI</b>                    |                             |                           |
| No                                                                 | 100.0                       | 100.0                     |
| <b>AI cause by virus</b>                                           |                             |                           |
| Yes                                                                | 100.0                       | 100.0                     |
| <b>AI cause by bacteria</b>                                        |                             |                           |
| No                                                                 | 100.0                       | 100.0                     |
| <b>AI cause by parasite</b>                                        |                             |                           |
| No                                                                 | 100.0                       | 100.0                     |
| <b>Do you know which species can be infected by AIV?</b>           |                             |                           |
| No                                                                 | 100.0                       | 100.0                     |
| <b>Know AI by television</b>                                       |                             |                           |
| No                                                                 | 15.7                        | 20.0                      |
| Yes                                                                | 84.3                        | 80.0                      |
| <b>Know AI by radio</b>                                            |                             |                           |
| No                                                                 | 19.6                        | 40.0                      |
| Yes                                                                | 80.4                        | 60.0                      |
| <b>Know AI by newspaper</b>                                        |                             |                           |
| No                                                                 | 86.3                        | 80.0                      |
| Yes                                                                | 13.7                        | 20.0                      |
| <b>Know AI by brochure</b>                                         |                             |                           |
| No                                                                 | 86.3                        | 80.0                      |
| Yes                                                                | 13.7                        | 20.0                      |
| <b>Know AI by local officer</b>                                    |                             |                           |
| Yes                                                                | 100.0                       | 100.0                     |
| <b>Know AI by local vet</b>                                        |                             |                           |
| Yes                                                                | 100.0                       | 100.0                     |
| <b>Know AI by the training course</b>                              |                             |                           |
| No                                                                 | 13.7                        | 10.0                      |
| Yes                                                                | 86.3                        | 90.0                      |
| <b>Thought that AI is controllable</b>                             |                             |                           |
| Yes                                                                | 100.0                       | 100.0                     |
| <b>AI can be controlled by vaccine</b>                             |                             |                           |
| Yes                                                                | 100.0                       | 100.0                     |
| <b>AI can be controlled by keeping the good environment</b>        |                             |                           |
| Yes                                                                | 100.0                       | 100.0                     |
| <b>AI can be controlled by keep separate poultry</b>               |                             |                           |
| No                                                                 | 72.5                        | 90.0                      |
| Yes                                                                | 27.5                        | 10.0                      |
| <b>AI can be controlled by separating the poultry newly import</b> |                             |                           |
| No                                                                 | 56.9                        | 90.0                      |
| Yes                                                                | 43.1                        | 10.0                      |

AI: avian influenza, LPAI: low pathogenicity avian influenza, HPAI: high pathogenicity avian influenza.

**Supplementary Table 4 (cont).** Numbers of respondents in each identified of the two respondent knowledge cluster groups (n=61) and percentages of responses for each question type

| Variable                                                           | Correct knowledge<br>(n=51) | Mixed knowledge<br>(n=10) |
|--------------------------------------------------------------------|-----------------------------|---------------------------|
| <b>AI can be controlled by soap wash</b>                           |                             |                           |
| Yes                                                                | 100.0                       | 100.0                     |
| <b>AI can spread by contact with the infected bird</b>             |                             |                           |
| Yes                                                                | 100.0                       | 100.0                     |
| <b>AI can spread by contact with the contaminated equipment</b>    |                             |                           |
| No                                                                 | 76.5                        | 90.0                      |
| Yes                                                                | 23.5                        | 10.0                      |
| <b>AI can spread by contact with the contaminated cloth/boot</b>   |                             |                           |
| No                                                                 | 100.0                       | 100.0                     |
| <b>Human can be infected by AI from the infected bird</b>          |                             |                           |
| No                                                                 | 88.2                        | 100.0                     |
| Yes                                                                | 11.8                        | 0.0                       |
| <b>Human can be infected by AI from the contaminated equipment</b> |                             |                           |
| No                                                                 | 100.0                       | 100.0                     |
| <b>Human can be infected with AI by eating the sick bird</b>       |                             |                           |
| No                                                                 | 0.0                         | 80.0                      |
| Yes                                                                | 100.0                       | 20.0                      |
| <b>Human can be infected with AI by unknown source</b>             |                             |                           |
| No                                                                 | 100.0                       | 20.0                      |
| Yes                                                                | 0.0                         | 80.0                      |
| <b>Know the AI clinical signs</b>                                  |                             |                           |
| Yes                                                                | 100.0                       | 30.0                      |
| Not sure                                                           | 0.0                         | 70.0                      |
| <b>AI clinical sign can be observe in chicken</b>                  |                             |                           |
| Yes                                                                | 100.0                       | 100.0                     |
| <b>AI clinical sign can be observe in duck</b>                     |                             |                           |
| No                                                                 | 54.9                        | 30.0                      |
| Yes                                                                | 45.1                        | 70.0                      |
| <b>AI clinical sign can be observe in Muscovy duck</b>             |                             |                           |
| No                                                                 | 100.0                       | 100.0                     |
| <b>AI clinical sign is depression</b>                              |                             |                           |
| Yes                                                                | 100.0                       | 100.0                     |
| <b>AI clinical sign is edema in the comb</b>                       |                             |                           |
| Yes                                                                | 100.0                       | 100.0                     |
| <b>AI clinical sign is eye swelling</b>                            |                             |                           |
| No                                                                 | 76.5                        | 90.0                      |
| Yes                                                                | 23.5                        | 10.0                      |
| <b>AI clinical sign is sudden death</b>                            |                             |                           |
| Yes                                                                | 100.0                       | 100.0                     |
| <b>AI clinical sign is ruffed</b>                                  |                             |                           |
| No                                                                 | 100.0                       | 100.0                     |
| <b>AI clinical sign is diarrhea</b>                                |                             |                           |
| No                                                                 | 100.0                       | 100.0                     |

**Supplementary Table 4 (cont).** Numbers of respondents in each identified of the two respondent knowledge cluster groups (n=61) and percentages of responses for each question type

| Variable                                    | Correct knowledge<br>(n=51) | Mixed knowledge<br>(n=10) |
|---------------------------------------------|-----------------------------|---------------------------|
| <b>Attended the AI training</b>             |                             |                           |
| No                                          | 13.7                        | 0.0                       |
| Yes                                         | 86.3                        | 100.0                     |
| <b>Know about vet law</b>                   |                             |                           |
| Yes                                         | 100.0                       | 100.0                     |
| <b>Know the purpose of the surveillance</b> |                             |                           |
| Early detection                             | 90.2                        | 90.0                      |
| Diagnosis                                   | 9.8                         | 10.0                      |

**Supplementary Table 5.** Numbers of respondents in each identified of the three respondent attitude cluster groups (n=61) and percentages of responses for each question type

| Variable                                                            | Report AI but disagree with policy<br>(n=8) | Report AI and agree with policy<br>(n=46) | Don't Report AI<br>(n=7) |
|---------------------------------------------------------------------|---------------------------------------------|-------------------------------------------|--------------------------|
| <b>Willing to report if recognize an AI event around</b>            |                                             |                                           |                          |
| Yes                                                                 | 100.0                                       | 100.0                                     | 0.0                      |
| Not sure                                                            | 0.0                                         | 0.0                                       | 100.0                    |
| <b>Report AI event to the local officer</b>                         |                                             |                                           |                          |
| No                                                                  | 0.0                                         | 0.0                                       | 100.0                    |
| Yes                                                                 | 100.0                                       | 100.0                                     | 0.0                      |
| <b>Report AI event to the local vet</b>                             |                                             |                                           |                          |
| No                                                                  | 0.0                                         | 0.0                                       | 100.0                    |
| Yes                                                                 | 100.0                                       | 100.0                                     | 0.0                      |
| <b>Report AI event to the local government</b>                      |                                             |                                           |                          |
| No                                                                  | 0.0                                         | 0.0                                       | 100.0                    |
| Yes                                                                 | 100.0                                       | 100.0                                     | 0.0                      |
| <b>Do you think using PPE is safer for poultry contact?</b>         |                                             |                                           |                          |
| Yes                                                                 | 100.0                                       | 100.0                                     | 100.0                    |
| <b>AI situation is important for your business</b>                  |                                             |                                           |                          |
| Yes                                                                 | 100.0                                       | 100.0                                     | 100.0                    |
| <b>Do you think AI situation in your area become more severe?</b>   |                                             |                                           |                          |
| No                                                                  | 37.5                                        | 15.2                                      | 57.1                     |
| Yes                                                                 | 62.5                                        | 84.8                                      | 42.9                     |
| <b>Do you think the AI information provided to you was enough?</b>  |                                             |                                           |                          |
| Yes                                                                 | 100.0                                       | 100.0                                     | 100.0                    |
| <b>Do you agree with the local control measures?</b>                |                                             |                                           |                          |
| No                                                                  | 100.0                                       | 0.0                                       | 0.0                      |
| Yes                                                                 | 0.0                                         | 100.0                                     | 100.0                    |
| <b>Do you think AI control is your benefit?</b>                     |                                             |                                           |                          |
| No                                                                  | 87.5                                        | 0.0                                       | 0.0                      |
| Yes                                                                 | 12.5                                        | 100.0                                     | 100.0                    |
| <b>Do you think AI control is your responsibility?</b>              |                                             |                                           |                          |
| No                                                                  | 100.0                                       | 4.3                                       | 0.0                      |
| Yes                                                                 | 0.0                                         | 95.7                                      | 100.0                    |
| <b>Do you want to receive more AI information?</b>                  |                                             |                                           |                          |
| Yes                                                                 | 100.0                                       | 100.0                                     | 100.0                    |
| <b>Television is an effective way to collect the AI information</b> |                                             |                                           |                          |
| No                                                                  | 12.5                                        | 30.4                                      | 14.3                     |
| Yes                                                                 | 87.5                                        | 69.6                                      | 85.7                     |
| <b>Radio is an effective way to collect the AI information</b>      |                                             |                                           |                          |
| No                                                                  | 25.0                                        | 26.1                                      | 28.6                     |
| Yes                                                                 | 75.0                                        | 73.9                                      | 71.4                     |
| <b>Brochure is an effective way to collect the AI information</b>   |                                             |                                           |                          |
| No                                                                  | 37.5                                        | 60.9                                      | 57.1                     |
| Yes                                                                 | 62.5                                        | 39.1                                      | 42.9                     |
| <b>Newspaper is an effective way to collect the AI information</b>  |                                             |                                           |                          |
| No                                                                  | 37.5                                        | 63.0                                      | 28.6                     |
| Yes                                                                 | 62.5                                        | 37.0                                      | 71.4                     |

AI: avian influenza, PPE: personal protective equipment.

**Supplementary Table 5 (cont).** Numbers of respondents in each identified of the three respondent attitude cluster groups (n=61) and percentages of responses for each question type

| Variable                                                               | <b>Report AI but disagree with policy<br/>(n=8)</b> | <b>Report AI and agree with policy<br/>(n=46)</b> | <b>Don't Report AI<br/>(n=7)</b> |
|------------------------------------------------------------------------|-----------------------------------------------------|---------------------------------------------------|----------------------------------|
| <b>Local officer is an effective way to collect the AI information</b> |                                                     |                                                   |                                  |
| Yes                                                                    | 100.0                                               | 100.0                                             | 100.0                            |
| <b>Local vet is an effective way to collect the AI information</b>     |                                                     |                                                   |                                  |
| Yes                                                                    | 100.0                                               | 100.0                                             | 100.0                            |
| <b>Neighbor is an effective way to collect the AI information</b>      |                                                     |                                                   |                                  |
| No                                                                     | 75.0                                                | 56.5                                              | 57.1                             |
| Yes                                                                    | 25.0                                                | 43.5                                              | 42.9                             |
| <b>Willing to join the AI surveillance</b>                             |                                                     |                                                   |                                  |
| Yes                                                                    | 100.0                                               | 100.0                                             | 100.0                            |

**Supplementary Table 6.** Numbers of respondents in each identified of the two respondent practice cluster groups (n=61) and percentages of responses for each question type

| Variable                                                              | High biosecurity<br>(n=17) | Low biosecurity<br>(n=44) |
|-----------------------------------------------------------------------|----------------------------|---------------------------|
| <b>Use PPE when slaughtering</b>                                      |                            |                           |
| Yes                                                                   | 100.0                      | 100.0                     |
| <b>The frequency of PPE using when slaughtering</b>                   |                            |                           |
| Some time                                                             | 11.8                       | 100.0                     |
| Always                                                                | 88.2                       | 0.0                       |
| <b>Use PPE when handling the death bird</b>                           |                            |                           |
| No                                                                    | 0.0                        | 93.2                      |
| Yes                                                                   | 100.0                      | 6.8                       |
| <b>Disinfectant equipment</b>                                         |                            |                           |
| Yes                                                                   | 100.0                      | 100.0                     |
| <b>The frequency of disinfectant equipment</b>                        |                            |                           |
| Some time                                                             | 0.0                        | 88.6                      |
| Always                                                                | 100.0                      | 11.4                      |
| <b>Disinfect vehicle</b>                                              |                            |                           |
| No                                                                    | 11.8                       | 100.0                     |
| Yes                                                                   | 88.2                       | 0.0                       |
| <b>Share vehicle</b>                                                  |                            |                           |
| Always                                                                | 0.0                        | 31.8                      |
| Some time                                                             | 0.0                        | 68.2                      |
| Never                                                                 | 100.0                      | 0.0                       |
| <b>Bury the dead bird if found it around</b>                          |                            |                           |
| Yes                                                                   | 100.0                      | 100.0                     |
| <b>Slaughter the dead bird if found it around</b>                     |                            |                           |
| No                                                                    | 100.0                      | 100.0                     |
| <b>Feed the dead bird to the other animal if found it around</b>      |                            |                           |
| No                                                                    | 100.0                      | 100.0                     |
| <b>Throw the dead bird if found it around</b>                         |                            |                           |
| No                                                                    | 100.0                      | 100.0                     |
| <b>Burn the dead bird then disinfect the area if found it around</b>  |                            |                           |
| Yes                                                                   | 100.0                      | 100.0                     |
| <b>Report the dead bird to the local authority if found it around</b> |                            |                           |
| No                                                                    | 5.9                        | 13.6                      |
| Yes                                                                   | 94.1                       | 86.4                      |
| <b>Disinfect the barn</b>                                             |                            |                           |
| Yes                                                                   | 100.0                      | 100.0                     |
| <b>The frequency of disinfect barn</b>                                |                            |                           |
| Some time                                                             | 17.6                       | 90.9                      |
| Always                                                                | 82.4                       | 9.1                       |
| <b>Barn disinfectan method</b>                                        |                            |                           |
| Water                                                                 | 100.0                      | 0.0                       |
| Chemical                                                              | 0.0                        | 100.0                     |
| <b>Separate the sick bird if found inside farm</b>                    |                            |                           |
| Yes                                                                   | 100.0                      | 100.0                     |

PPE: personal protective equipment.



**Supplementary Table 6 (cont).** Numbers of respondents in each identified of the two respondent practice cluster groups (n=61) and percentages of responses for each question type

| Variable                                                                | High biosecurity<br>(n=17) | Low biosecurity<br>(n=44) |
|-------------------------------------------------------------------------|----------------------------|---------------------------|
| <b>Slaughter the sick bird if found inside farm</b>                     |                            |                           |
| No                                                                      | 100.0                      | 90.9                      |
| Yes                                                                     | 0.0                        | 9.1                       |
| <b>Sell the sick bird if found inside farm</b>                          |                            |                           |
| No                                                                      | 100.0                      | 95.5                      |
| Yes                                                                     | 0.0                        | 4.5                       |
| <b>Treat the sick bird if found inside farm</b>                         |                            |                           |
| Yes                                                                     | 100.0                      | 100.0                     |
| <b>Report the sick bird to the local authority if found inside farm</b> |                            |                           |
| No                                                                      | 0.0                        | 11.4                      |
| Yes                                                                     | 100.0                      | 88.6                      |
| <b>Feed the dead bird to the other animal if found inside farm</b>      |                            |                           |
| No                                                                      | 100.0                      | 100.0                     |
| <b>Throw dead bird if found inside farm</b>                             |                            |                           |
| No                                                                      | 100.0                      | 100.0                     |
| <b>Burn or bury the dead bird if found inside farm</b>                  |                            |                           |
| Yes                                                                     | 100.0                      | 100.0                     |
| <b>Report the dead bird to the local authority if found inside farm</b> |                            |                           |
| No                                                                      | 0.0                        | 29.5                      |
| Yes                                                                     | 100.0                      | 70.5                      |
| <b>Separate the newly imported poultry</b>                              |                            |                           |
| No                                                                      | 0.0                        | 50.0                      |
| Yes                                                                     | 100.0                      | 50.0                      |
| <b>Keep separate species</b>                                            |                            |                           |
| No                                                                      | 11.8                       | 63.6                      |
| Yes                                                                     | 88.2                       | 36.4                      |
| <b>The method to sell the poultry</b>                                   |                            |                           |
| Bring to market                                                         | 0.0                        | 34.1                      |
| Sell to trader                                                          | 100.0                      | 50.0                      |
| Self-consume                                                            | 0.0                        | 15.9                      |
